# Supplementary material for: Effects of cigarette smoke exposure during suckling on food intake, fat mass, hormones, and biochemical profile of young and adult female rats
Source: Springer Nature journal article supplement (doi:10.1007/s12020-017-1320-7), 2017-05-19
Supplement: MOESM1 [file 12300232]

**Table 1: Changes in neonate and adult male rat offspring that were exposed to cigarette smoke during suckling.**

|  | **Weaning (PN21)** | | | **Adulthood (PN180)** | |
| --- | --- | --- | --- | --- | --- |
| **Parameters** | **CONTROL** | | **SMOKE** | **CONTROL** | **SMOKE** |
| **Total food intake (g)** | - | - | | 3378 ± 84 | 3610 ± 53* |
| **Total body mass (g)** | 36.1 ± 0.7 | 33.8 ± 0.7* | | 398 ± 9.7 | 435 ± 9.4* |
| **Visceral fat mass (g)** | 0.100 ± 0.01 | 0.060 ± 0.01* | | 17.0 ± 1.4 | 23.9 ± 2.6* |
| **Fat mass (%)** | - | - | | 15.2 ± 1.1 | 20.7 ± 1.9* |
| **Lean mass (%)** | - | - | | 67.4 ± 1.3 | 62.0 ± 1.9* |
| **Serum triglycerides (mg/dL)** | 10.7 ± 1.0 | 11.3 ± 1.5 | | 53.6 ± 2.0 | 70.5 ± 5.0* |
| **Serum cholesterol (mg/dL)** | 86.6 ± 8.8 | 79.4 ± 10.9 | | 63.4 ± 4.9 | 60.8 ± 6.0 |
| **Serum glucose (mg/dL)** | 113 ± 3 | 116 ± 3 | | 86.3 ± 2.6 | 77.2 ± 2.0 |
| **Serum insulin (μlU/mL)** | 21.61 ± 2.57 | 12.9 ± 3.7* | | 11.7 ± 1.5 | 15.8 ± 1.1* |
| **Serum leptin (ng/mL)** | 2.40 ± 0.33 | 2.03 ± 0.33 | | 2.92 ± 0.38 | 4.7 ± 0.6* |
| **Leptin expression in VAT** | - | - | | 1.01 ± 0.09 | 1.91 ± 0.20* |
| **Leptin expression in SAT** | - | - | | 2.64 ± 0.48 | 2.23 ± 0.35 |
| **Serum TSH (ng/mL)** | - | - | | 3.17 ± 0.12 | 3.63 ± 0.12* |
| **Serum free T4 (ng/dL)** | 0.55 ± 0.03 | 0.73 ± 0.06* | | 1.94 ± 0.08 | 2.34 ± 0.13* |
| **Serum total T3 (ng/dL)** | 102 ± 15 | 113 ± 6 | | 44.6 ± 2.5 | 56.0 ± 4.5* |
| **Adrenal total catecholamines (μM)** | 175 ± 2.6 | 186 ± 4* | | 38.3 ± 3.7 | 28.7 ± 2.4* |
| **Serum corticosterone (ng/mL)** | 148 ± 24 | 220 ± 25* | | 713 ± 165 | 479 ± 64* |

PN: postnatal day. Total food intake is shown as the amount of ingested chow in grams from PN33-PN180. Total body mass is shown as the amount of body mass gain in grams from PN21-PN180. Leptin expression represents leptin/actin mRNA levels in visceral or subcutaneous adipose tissue (VAT, SAT). TSH: thyrotropin; T4: thyroxine; T3: triiodothyronine. These results reproduced some of the changes that have already been previously published (Santos-Silva et al, 2011, Santos-Silva et al, 2013, Pinheiro et al, 2015). n = 8 rats per group. Values represent mean ± SEM. * P < 0.05.
